# Supplementary material
Source: PubMed Central journal article supplement (PMC149219)
Supplement: nar_31_3_e7__1.pdf [file nar_31_3_e7__1.pdf]

SUPPLEMENTARY TABLES FOR NAR-00703-2002.R1

| Template (+2) | Substrate<br>Polymerase<br>Primer | % primer extension by dNTP |            |            |            |           |            |
|---------------|-----------------------------------|----------------------------|------------|------------|------------|-----------|------------|
|               |                                   | KF-<br>P1                  | KF-<br>SP1 | KF+<br>SP1 | T4+<br>SP1 | T7-<br>P1 | T7+<br>SP1 |
| LTA (T)       | dTTP                              | 29                         | 23         | 13         | -          | -         | -          |
| LTC (A)       | dGTP                              | 39                         | 32         | -          | -          | -         | -          |
| LTG (A)       | dCTP                              | 77                         | 60         | 8          | -          | -         | -          |
| LTT (A)       | dATP                              | 91                         | 85         | 32         | -          | -         | -          |
|               | Incorrect avg                     | 59                         | 50         | 13         | 0          | 0         | 0          |

Table S1. Incorrect double addition of dNTP substrates by exonuclease-deficient (-) and proofreading (+) variants of Klenow fragment (KF), T4 DNAP (T4) and T7 DNAP (T7). The identity of the template nucleotide for misincorporation is shown in brackets. “-“ entries indicate values below the limit of detection (< 5%).

|     | Substrate            | % primer extension by acyNTP |                  |
|-----|----------------------|------------------------------|------------------|
|     | Polymerase           | Vent exo minus               | Vent exo plus    |
|     | Primer               | P1                           | SP1              |
|     | Buffer metal         | Mn <sup>2+</sup>             | Mn <sup>2+</sup> |
| LTA | dATP                 | 74                           | 13               |
|     | dCTP                 | 57                           | 22               |
|     | dGTP                 | 21                           | -                |
|     | <b>dTTP</b>          | <b>100</b>                   | <b>79</b>        |
| LTC | dATP                 | 84                           | 24               |
|     | dCTP                 | 15                           | -                |
|     | <b>dGTP</b>          | <b>100</b>                   | <b>80</b>        |
|     | dTTP                 | 100                          | 28               |
| LTG | dATP                 | 55                           | 8                |
|     | <b>dCTP</b>          | <b>100</b>                   | <b>72</b>        |
|     | dGTP                 | 75                           | 14               |
|     | dTTP                 | 93                           | 22               |
| LTT | <b>dATP</b>          | <b>100</b>                   | <b>69</b>        |
|     | dCTP                 | 74                           | 21               |
|     | dGTP                 | 65                           | 8                |
|     | dTTP                 | 65                           | 9                |
|     | Incorrect avg        | 64                           | 14               |
|     | Correct avg          | 100                          | 75               |
|     | I/C <sub>avg</sub> % | 64                           | 19               |

Table S2. Effect of Mn<sup>2+</sup> on deoxynucleotide incorporation by Vent DNA polymerase. Extension reactions were conducted in the presence of 2 mM MnSO<sub>4</sub> in place of the 2 mM MgSO<sub>4</sub> in the standard reaction buffer. Correct nucleotide incorporation appears in bold. “-” entries indicate values below the limit of detection (< 5%). Reaction conditions consisted of 10 μM primer, 4 μM template, 200 μM substrate, 2 U polymerase, 35 cycles of 30 s at 85 °C, 1 min at 53 °C, 1 min at 63 °C.

| Template               | Substrate       | % primer extension      |           |          |
|------------------------|-----------------|-------------------------|-----------|----------|
|                        | Polymerase      | exo <sup>-</sup> Klenow |           |          |
|                        | Primer          | SP1                     |           |          |
|                        | Exonuclease III | 0 units                 | 1 unit    | 5 units  |
| LTT <sup>a</sup>       | dATP            | 87                      | 94        | 82       |
| <b>LTA<sup>a</sup></b> | <b>dATP</b>     | <b>46</b>               | <b>20</b> | <b>9</b> |
| LTC <sup>a</sup>       | dGTP            | 92                      | 94        | 90       |
| <b>LTT<sup>a</sup></b> | <b>dGTP</b>     | <b>63</b>               | <b>45</b> | <b>7</b> |
| LTG <sup>b</sup>       | ddCTP           | 100                     | 100       | 100      |
| <b>LTG<sup>b</sup></b> | <b>ddGTP</b>    | <b>42</b>               | <b>40</b> | -        |
| LTT <sup>b</sup>       | ddATP           | 81                      | 83        | 80       |
| <b>LTT<sup>b</sup></b> | <b>ddCTP</b>    | <b>66</b>               | <b>57</b> | -        |

Table S3. Effect of exonuclease III addition on misincorporation by exonuclease-deficient KF. Incorrect nucleotide incorporation for each template is shown in bold. “-” entries indicate values below the limit of detection (< 5%). In all cases the buffer used was the standard buffer supplied for DNA Pol I.

- a. 10 μM primer, 25 μM template, 200 μM substrate, 1 U polymerase, 60 min at 37 °C.  
b. 10 μM primer, 25 μM template, 1 mM substrate, 2 U polymerase, 4 h at 37 °C.
